# Supplementary material for: Is Unplanned Excision of Soft Tissue Sarcomas Associated with Worse Oncological Outcomes?—A Systematic Review and Meta-Analysis
Source: MDPI journal article supplement (doi:10.3390/cancers16020443), 2024-01-19
Supplement: s1 [file s1]

**Supplementary Table S3.** Quality Assessment Using Strengthening the Reporting of Observational Studies in Epidemiology (STROBE) Checklist Items.

| First Author (Year)      | Methods        |                     |                  |                     |                                |                      | Results                     |                         | Discussion           |                     | Score | Included |
|--------------------------|----------------|---------------------|------------------|---------------------|--------------------------------|----------------------|-----------------------------|-------------------------|----------------------|---------------------|-------|----------|
|                          | 5 -<br>Setting | 6 -<br>Participants | 7 -<br>Variables | 8 - Data<br>sources | 12 -<br>Statistical<br>Methods | 13 -<br>Participants | 14 -<br>Descriptive<br>data | 15 -<br>Outcome<br>data | 16 - Main<br>results | 19 -<br>Limitations |       |          |
| Arai et al [13]          | 2              | 2                   | 2                | 1                   | 2                              | 1                    | 1                           | 2                       | 2                    | 2                   | 17    | Yes      |
| Collin et al [19]        | 2              | 2                   | 2                | 1                   | 1                              | 2                    | 2                           | 2                       | 2                    | 2                   | 18    | Yes      |
| Davis et al [3]          | 2              | 2                   | 2                | 1                   | 2                              | 1                    | 1                           | 2                       | 2                    | 1                   | 16    | Yes      |
| Emrich et al [22]        | 2              | 2                   | 1                | 2                   | 2                              | 1                    | 1                           | 2                       | 2                    | 1                   | 16    | Yes      |
| Koulaxouzidis et al [27] | 2              | 2                   | 2                | 2                   | 1                              | 1                    | 1                           | 2                       | 2                    | 2                   | 17    | Yes      |
| Nakamura et al [33]      | 2              | 2                   | 1                | 1                   | 2                              | 2                    | 2                           | 2                       | 2                    | 2                   | 18    | Yes      |
| Rehders et al [38]       | 2              | 2                   | 2                | 1                   | 2                              | 1                    | 2                           | 1                       | 1                    | 2                   | 16    | Yes      |
| Scoccianti et al [41]    | 2              | 2                   | 2                | 2                   | 1                              | 1                    | 1                           | 2                       | 2                    | 1                   | 16    | Yes      |
| Ueda et al [45]          | 2              | 2                   | 2                | 2                   | 2                              | 1                    | 2                           | 1                       | 1                    | 2                   | 17    | Yes      |
| Zhao et al [48]          | 2              | 2                   | 1                | 2                   | 1                              | 2                    | 2                           | 2                       | 2                    | 2                   | 18    | Yes      |
