# Supplementary material for: Is Unplanned Excision of Soft Tissue Sarcomas Associated with Worse Oncological Outcomes?—A Systematic Review and Meta-Analysis
Source: MDPI journal article supplement (doi:10.3390/cancers16020443), 2024-01-19
Supplement: s1 [file s1]

**Supplementary Table S1.** Patients receiving (neo)-adjuvant radiation treatment and/or chemotherapy by group.

| Author                    | Radiation therapy (%)                     |                                       | Chemotherapy (%)            |                           |
|---------------------------|-------------------------------------------|---------------------------------------|-----------------------------|---------------------------|
|                           | PE group <sup>a</sup>                     | UE group <sup>a</sup>                 | PE group <sup>a</sup>       | UE group <sup>a</sup>     |
| Alamanda et al. [11]      | Neoadj.: 14.5<br>Adj.: 44.2<br>Both: 15.9 | Neoadj.: 8.5<br>Adj.: 50<br>Both: 5.7 | U: 19.2                     | U: 17.9                   |
| Alsina et al. [8]         | -                                         | -                                     | -                           | -                         |
| Arai et al. [12]          | U: 19                                     | U: 13                                 | U: 38                       | U: 18                     |
| Arai et al. [13]          | -                                         | U: 8                                  | -                           | U: 15                     |
| Bateni et al. [14]        | Adj.: 48                                  | Adj.: 42.8                            | Adj.: 6.8                   | Adj.: 6.1                 |
| Bianchi et al. [15]       | U: 76                                     | Adj.: 100                             | Neoadj.: 15.2<br>Adj.: 21.8 | Neoadj.: 2<br>Adj.: 16    |
| Charoenlap et al. [16]    | Adj.: 89                                  | Adj.: 84.5                            | Adj.: 4.1                   | Adj.: 6.2                 |
| Choi et al. [17]          | Adj.: 60                                  | Adj.: 63                              | Adj.: 62                    | Adj.: 47                  |
| Chui et al. [18]          | -                                         | -                                     | -                           | -                         |
| Collin et al. [19]        | -                                         | -                                     | -                           | -                         |
| Cribb et al. [20]         | Adj.: 36.4                                | Adj.: 62.5                            | Adj.: 9.1                   | Adj.: 0                   |
| Danieli et al. [21]       | U: 56.5                                   | U: 33.9                               | U: 35.9                     | U: 17                     |
| Davis et al. [3]          | -                                         | -                                     | -                           | -                         |
| Emrich et al. [22]        | -                                         | -                                     | -                           | -                         |
| Erol et al. [23]          | Neoadj.: 6.7<br>Adj.: 77.3                | Neoadj.: 77.3<br>Adj.: 78             | Neoadj.: 8<br>Adj.: 49.3    | Neoadj.: 6<br>Adj.: 44    |
| Funovics et al. [24]      | Adj.: 74                                  | Adj.: 66.8                            | Adj.: 62.7                  | Adj.: 46.7                |
| Hanasilo et al. [25]      | Adj.: 62                                  | Adj.: 47.8                            | Adj.: 72.4                  | Adj.: 52.1                |
| Kheiran et al. [26]       | -                                         | -                                     | -                           | -                         |
| Koulaxouzidis et al. [27] | -                                         | -                                     | -                           | -                         |
| Lewis et al. [28]         | -                                         | -                                     | -                           | -                         |
| Liang et al. [29]         | -                                         | -                                     | -                           | -                         |
| Mihara et al. [30]        | -                                         | -                                     | -                           | -                         |
| Morattel et al. [31]      | -                                         | -                                     | -                           | -                         |
| Morii et al. [32]         | -                                         | -                                     | U: 29                       | U: 25                     |
| Nakamura et al. [33]      | -                                         | -                                     | -                           | -                         |
| Nishimura et al. [34]     | U: 22.2                                   | U: 40                                 | U: 33.3                     | U: 40                     |
| Potter et al. [35]        | Adj.: 58                                  | Adj.: 64                              | Adj.: 60                    | Adj.: 38                  |
| Quershi et al. [36]       | U: 45.8                                   | U: 62.8                               | U: 29                       | U: 31.4                   |
| Qureshi et al. [37]       | -                                         | -                                     | -                           | -                         |
| Rehders et al. [38]       | -                                         | -                                     | -                           | -                         |
| Rhee et al. [39]          | Neoadj.: 100                              | Neoadj.: 100                          | -                           | -                         |
| Saeed et al. [40]         | Neoadj.: 77.2<br>Adj.: 11.4               | Neoadj.: 32.3<br>Adj.: 17.7           | U: 32                       | U: 3                      |
| Scoccianti et al. [41]    | -                                         | -                                     | -                           | -                         |
| Smolle et al. [4]         | Adj.: 51.7                                | Adj.: 59.4                            | Adj.: 33.3                  | Adj.: 24.2                |
| Takemori et al. [42]      | Adj.: 9.1                                 | Adj.: 8.33                            | Adj.: 10                    | Adj.: 20.8                |
| Thacker et al. [43]       | Adj.: 8.7                                 | Adj.: 55                              | -                           | -                         |
| Tokumoto et al. [9]       | Adj.: 27                                  | Adj.: 16.2                            | Adj.: 28.2                  | Adj.: 18.1                |
| Traub et al. [44]         | Adj.: 85.7                                | Adj.: 85.1                            | Adj.: 8.6                   | Adj.: 6.4                 |
| Ueda et al. [45]          | -                                         | -                                     | -                           | -                         |
| Wang et al. [10]          | U: 41.4                                   | U: 50                                 | U: 14.3                     | U: 20.5                   |
| Zacherl et al. [46]       | Adj.: 57.1                                | Adj.: 71.4                            | Neoadj.: 21.4<br>Adj.: 37.5 | Neoadj.: 10.7<br>Adj.: 25 |
| Zaidi et al. [47]         | Neoadj.: 27<br>Adj.: 23                   | Neoadj.: 9<br>Adj.: 28                | Neoadj.: 18                 | Neoadj.: 6                |
| Zhao et al. [48]          | -                                         | -                                     | -                           | -                         |

<sup>a</sup> The values displayed in these columns refer to the proportion of patients receiving such treatment (out of the total number of patients in the group).

*Adj.*: adjuvant; *Neoadj.*: neoadjuvant; *PE*: planned excision; *U*: unspecified; *UE*: unplanned excision.
