# Supplementary material for: Is Unplanned Excision of Soft Tissue Sarcomas Associated with Worse Oncological Outcomes?—A Systematic Review and Meta-Analysis
Source: MDPI journal article supplement (doi:10.3390/cancers16020443), 2024-01-19
Supplement: s1 [file s1]

**Supplementary Table S2.** Location and histology of soft tissue sarcomas by group among included studies.

| Author                    | UEx (%) <sup>a</sup> | LEx (%) <sup>a</sup> | Trunk (%) <sup>a</sup> | Most common soft tissue sarcoma histology by group (%) |                                              |
|---------------------------|----------------------|----------------------|------------------------|--------------------------------------------------------|----------------------------------------------|
|                           |                      |                      |                        | PE group                                               | UE group                                     |
| Alamanda et al. [11]      | 20.9 / 39.6          | 79.1 / 60.4          | 0 / 0                  | UPS (36.6), LPS (32.6), LMS (8.1)                      | UPS (35.9), SS (14.2), FS (11.3)             |
| Alsina et al. [8]         | 18.8 / 24.1          | 74.2 / 60            | 2.9 / 11.8             | UPS (32.5), LPS (27), SS (10.4)                        | UPS (31.7), LPS (14.5), SS (12.4)            |
| Arai et al. [12]          | -                    | -                    | -                      | LPS (29.7) UPS (17.2), MPNST (10.2)                    | UPS (25.4) LPS (15.9), DFSP (14.3)           |
| Arai et al. [13]          | - / 18.6             | - / 48.7             | - / 32.7               | -                                                      | UPS (34.5), LPS (19.5), DFP (10.6)           |
| Bateni et al. [14]        | 19.6 / 24            | 41.2 / 36.2          | 46.3 / 38.8            | UPS (30.6), LPS (24.3), Sarcoma NOS (20.9)             | UPS (31.6), LPS (19.9), Sarcoma NOS (17.8)   |
| Bianchi et al. [15]       | 25 / 23              | 75 / 77              | 0 / 0                  | UPS (28), Fibroblastic/MFS (24), LPS (16)              | UPS (34), SS (17), Fibroblastic/MFS (17)     |
| Charoenlap et al. [16]    | -                    | -                    | 10 / 13.7              | UPS (36.9), LPS (16.5), SS (7.9)                       | UPS (37.9), LMS (12.4) SS (11.2)             |
| Choi et al. [17]          | 12 / 29              | 88 / 71              | -                      | -                                                      | -                                            |
| Chui et al. [18]          | -                    | -                    | 5.3 / 11.7             | SS (23.3), UPS (23.3), FS (16.7)                       | SS (36.8), UPS (10.5)                        |
| Collin et al. [19]        | -                    | -                    | -                      | -                                                      | -                                            |
| Cribb et al. [20]         | -                    | 100 / 100            | -                      | SS (27.3), CCS (18.2)                                  | SS (56.3), MFS (12.5)                        |
| Danieli et al. [21]       | 23.5 / 28.9          | 69.1 / 56.9          | 7.4 / 14.2             | UPS (19.1), MFS (17.4), LPS (12.0)                     | MFS (15.7), LPS (13.3), UPS (13)             |
| Davis et al. [3]          | -                    | -                    | -                      | -                                                      | -                                            |
| Emrich et al. [22]        | -                    | -                    | -                      | -                                                      | -                                            |
| Erol et al. [23]          | 16 / 32              | 82.7 / 66            | 1.3 / 2                | -                                                      | -                                            |
| Funovics et al. [24]      | 16.6 / 26.3          | 64.9 / 56.4          | 18.5 / 17.4            | LPS (14.6), SS (13.5), LMS (12.4)                      | LPS (15.8), SS (13.5), UPS (13.5)            |
| Hanasilo et al. [25]      | -                    | -                    | -                      | -                                                      | -                                            |
| Kheiran et al. [26]       | -                    | 100 / 100            | -                      | SS (42.1), LMS (15.8)                                  | LMS (42.9), SS (28.6)                        |
| Koulaxouzidis et al. [27] | - / 31               | - / 47.9             | - / 19.7               | -                                                      | LPS (37.3), UPS (21.7), FS (13.3)            |
| Lewis et al. [28]         | -                    | -                    | -                      | LPS (27.9), UPS (24.4), SS (12.3)                      | UPS (33.9), LPS (22.4), SS (13)              |
| Liang et al. [29]         | -                    | -                    | 39.8 / 36.4            | -                                                      | -                                            |
| Mihara et al. [30]        | 17 / 19              | 59 / 53              | 27.3 / 90.6            | -                                                      | -                                            |
| Morattel et al. [31]      | 10.9 / 23.4          | 87.6 / 70.3          | 1.2 / 6.3              | Sarcoma NOS (29.9) LPS/ALT (29.1), SS (8.6)            | Sarcoma NOS (25), MFS (18.7) LPS/ALT (17.2), |
| Morii et al. [32]         | 16.2 / 25            | 67.6 / 58.3          | 16.2 / 16.7            | -                                                      | -                                            |
| Nakamura et al. [33]      | -                    | -                    | -                      | -                                                      | UPS (25.9), LPS (18.8), MFS (13.2)           |
| Nishimura et al. [34]     | -                    | -                    | -                      | -                                                      | SS (60), CCS (20), RMS (20)                  |
| Potter et al. [35]        | -                    | -                    | -                      | -                                                      | -                                            |
| Quershi et al. [36]       | -                    | -                    | -                      | -                                                      | -                                            |
| Qureshi et al. [37]       | 17.2 / 29.9          | 66.5 / 46.3          | 15.8 / 18.6            | LPS (25.8), UPS (18.2), MFS (14.4)                     | LMS (17.9), LPS (14.9), MFS (11.2)           |
| Rehders et al. [38]       | - / 22               | - / 51               | - / 27                 | -                                                      | LPS (28), UPS (26), LMS (11)                 |
| Rhee et al. [39]          | 11.8 / 43.5          | 76.5 / 47.8          | 11.8 / 8.7             | MFS (100)                                              | MFS (100)                                    |
| Saeed et al. [40]         | 23.7 / 38.2          | 76.3 / 61.8          | -                      | UPS (24.1), LPS (32.2), SS (18)                        | LPS (26.5), SS (20.6), UPS (17.6),           |
| Scoccianti et al. [41]    | - / 32.8             | - / 55.7             | - / 8.4                | -                                                      | LMS (17.6), UPS (14.5), LPS (14.5)           |
| Smolle et al. [4]         | 16.33 / 24.9         | 69.4 / 52.3          | 11.3 / 17.1            | LPS (28.1), MFS (22.4), LMS (9.8)                      | LPS (20.3), MFS (21.7), LMS (11.4)           |
| Takemori et al. [42]      | 17.3 / 12.5          | 60 / 58.3            | 12.7 / 20.8            | UPS (18.2), MFS (13.6), LMS (12.7)                     | MFS (25), UPS (20.8), LMS (16.7)             |
| Thacker et al. [43]       | -                    | -                    | -                      | -                                                      | -                                            |
| Tokumoto et al. [9]       | -                    | -                    | -                      | -                                                      | UPS (30), MFS (15), DFSP (11)                |
| Traub et al. [44]         | 20.5 / 24.4          | 79.6 / 75.5          | 0 / 0                  | UPS (41.4), LPS (16.5), MFS (7.1)                      | UPS (46.8), LPS (13.8), MPNST (10.6)         |

|                     |   |   |         |   |   |
|---------------------|---|---|---------|---|---|
| Ueda et al. [45]    | - | - | -       | - | - |
| Wang et al. [10]    | - | - | -       | - | - |
| Zacherl et al. [46] | - | - | -       | - | - |
| Zaidi et al. [47]   | - | - | 15 / 22 | - | - |
| Zhao et al. [48]    | - | - | 29.3    | - | - |

<sup>a</sup> The values displayed in these columns refer to patients with planned excision (first number) and with unplanned excision (second number).

*ALT*: atypical lipomatous tumor; *CCS*: clear cell sarcoma; *DFSP*: dermatofibrosarcoma protuberans; *FS*: fibrosarcoma; *LEx*: lower extremity; *LMS*: leiomyosarcoma; *LPS*: liposarcoma; *MFS*: myxofibrosarcoma; *MPNST*: malignant peripheral nerve sheath tumor; *NOS*: not otherwise specified; *PE*: planned excision; *RMS*: rhabdomyosarcoma; *SS*: synovial sarcoma; *UE*: unplanned excision; *UEx*: upper extremity; *UPS*: undifferentiated pleomorphic sarcoma.
