# Supplementary material for: Is Unplanned Excision of Soft Tissue Sarcomas Associated with Worse Oncological Outcomes?—A Systematic Review and Meta-Analysis
Source: MDPI journal article supplement (doi:10.3390/cancers16020443), 2024-01-19
Supplement: s1 [file s1]

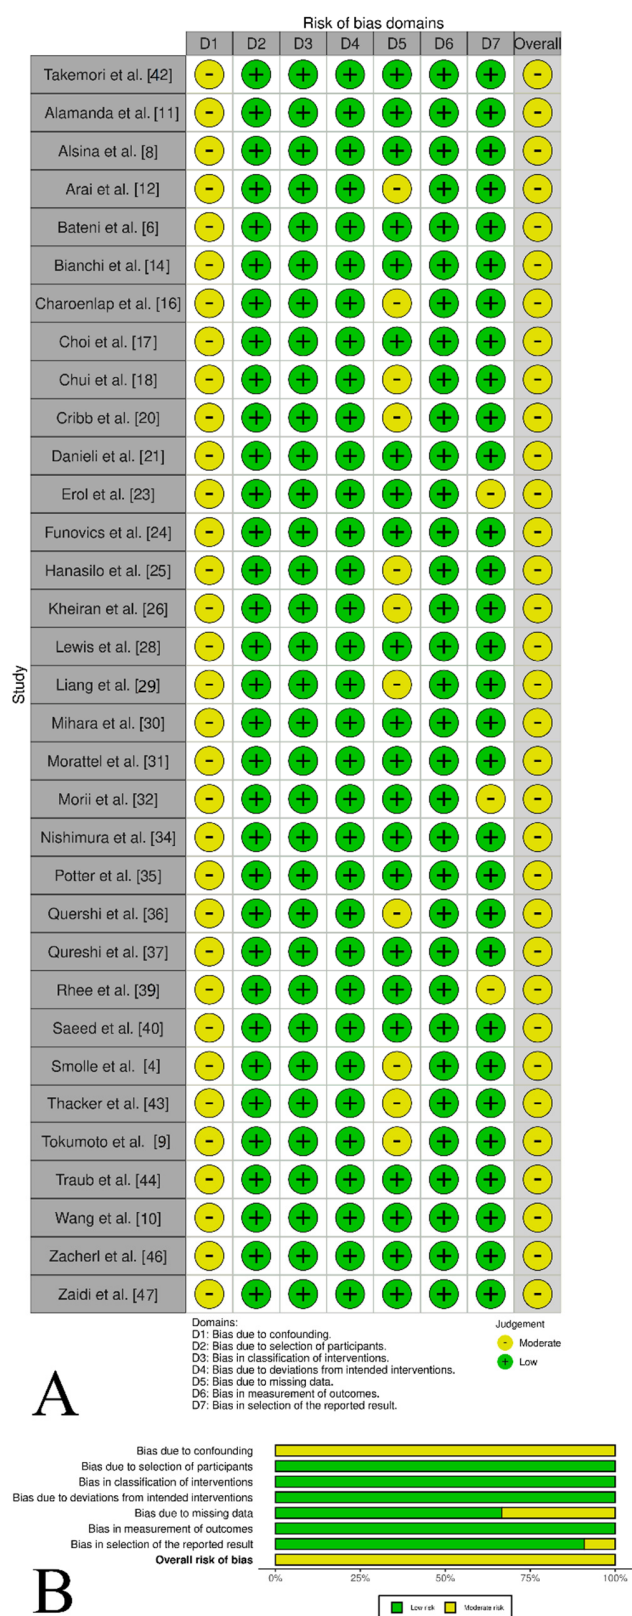

**Figure S1.** Risk of bias assessment using the Risk of Bias in Non-Randomized studies of Interventions (ROBINS-I) tool represented graphically using the Robvis online visualization tool (A,B).

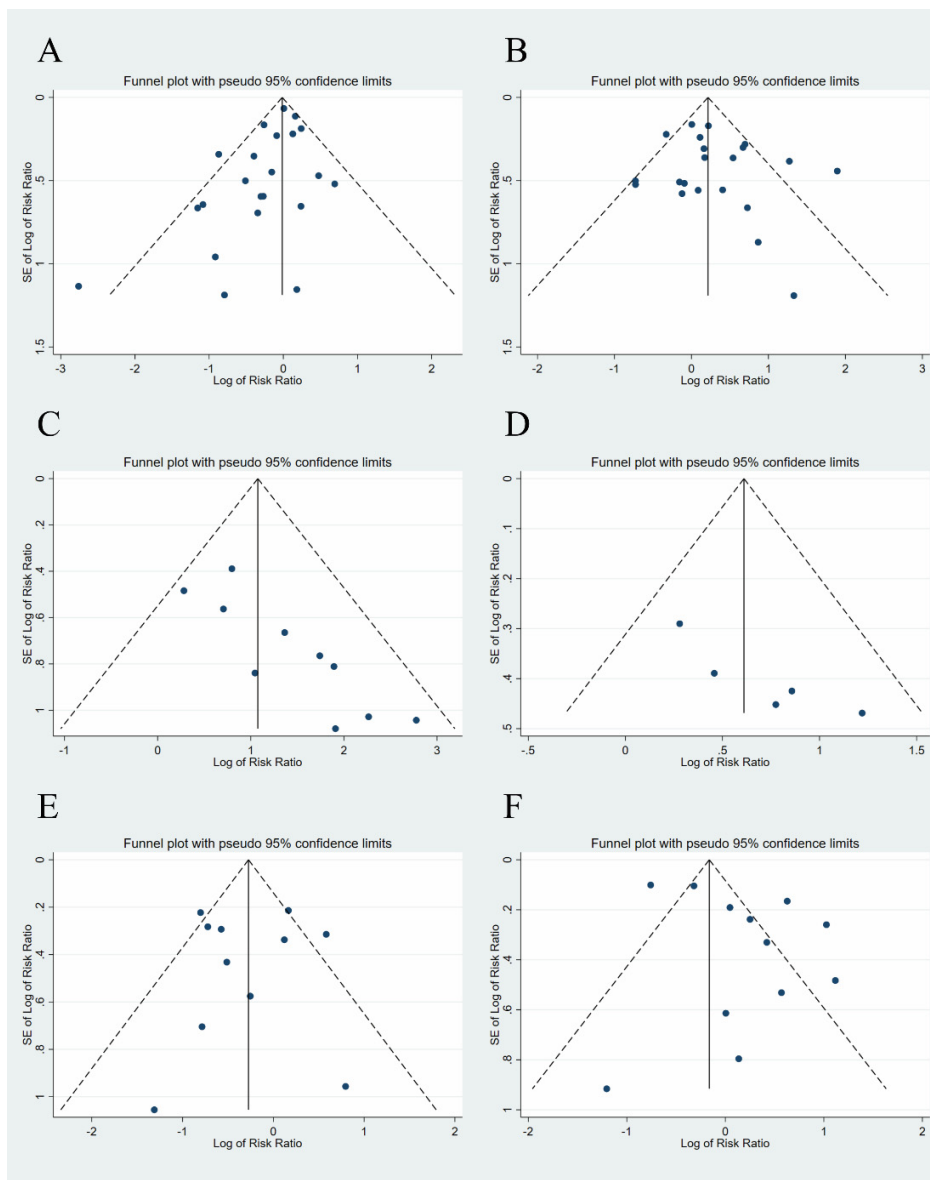

**Figure S2.** Funnel plots of all studies assessing (A) five-year overall survival, (B) five-year local recurrence-free survival in unplanned excision and planned excision patients, (C) five-year local recurrence in patients with positive and negative residual disease, (D) five-year overall survival in patients that did and did not develop local recurrence, (E) amputation rate and (F) plastic reconstruction surgery rate in unplanned excision and planned excision patient.
